# Supplementary material for: Tooth-Level Analysis of Dental Caries in Primary Dentition in Myanmar Children
Source: PubMed Central journal article supplement (PMC7589262; doi:10.3390/ijerph17207613), 2020-10-19
Supplement: ijerph-17-07613-s001.pdf [file ijerph-17-07613-s001.pdf]

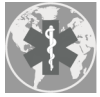

Supplemental materials

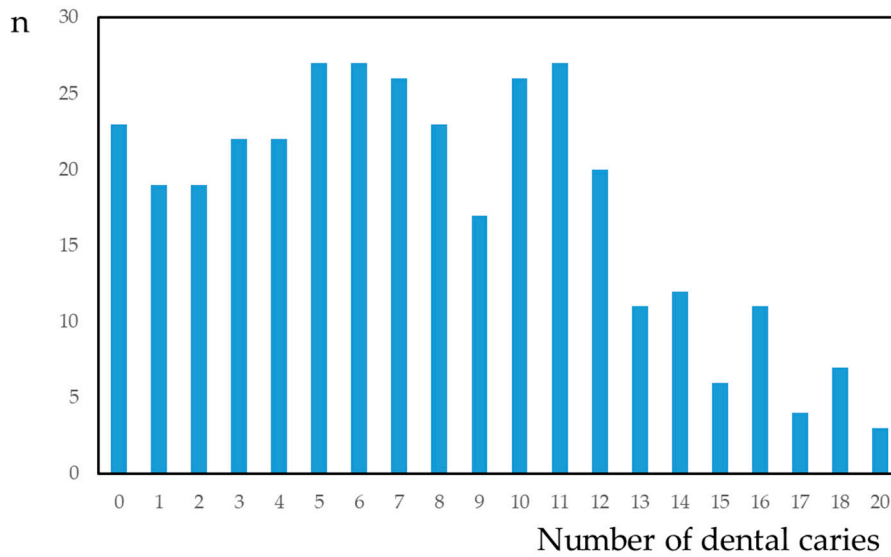

**Figure S1.** Histogram of number of dental caries.

Subjects with dental caries were 329 (93.5%). Prevalence of dental caries extremely high. As the missing teeth by dental caries was 58. They were included in this figure as dental caries. There was no filling teeth. By Kolmogorov–Smirnov test, number of dental carries was not normally distributed ( $P < 0.001$ ).

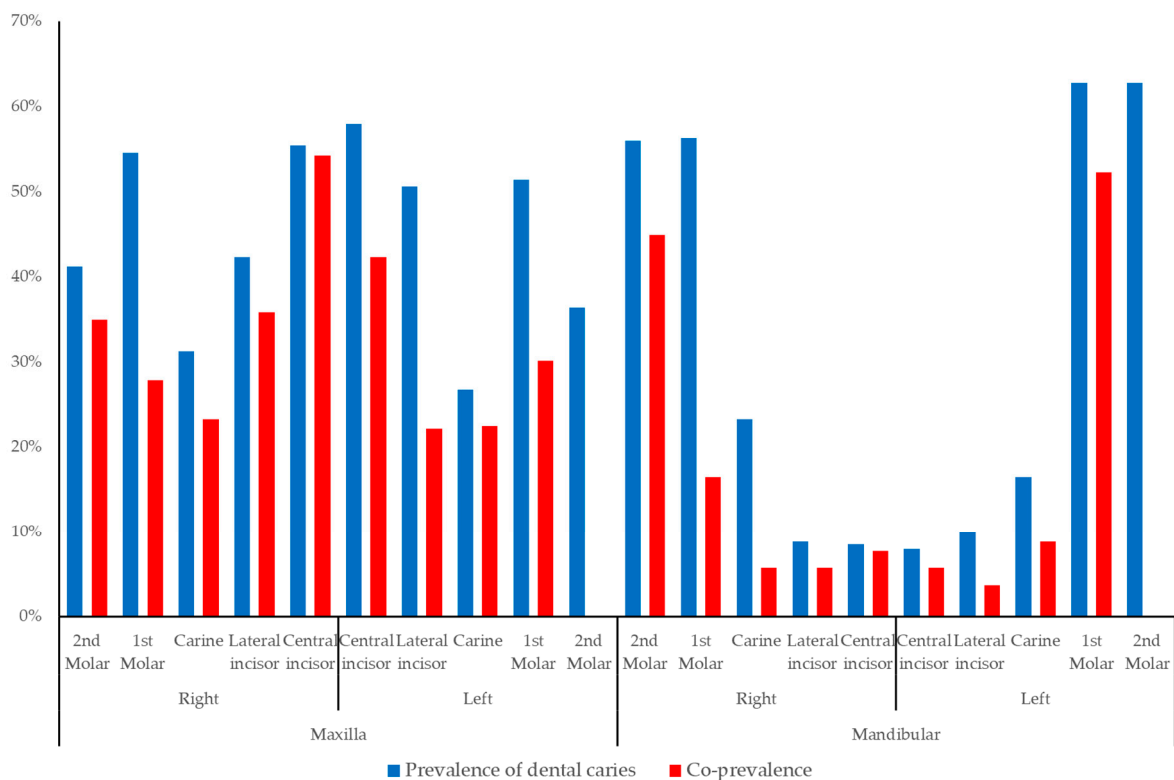

**Figure S2.** Co-prevalence of dental caries for adjacent teeth in primary dentition.

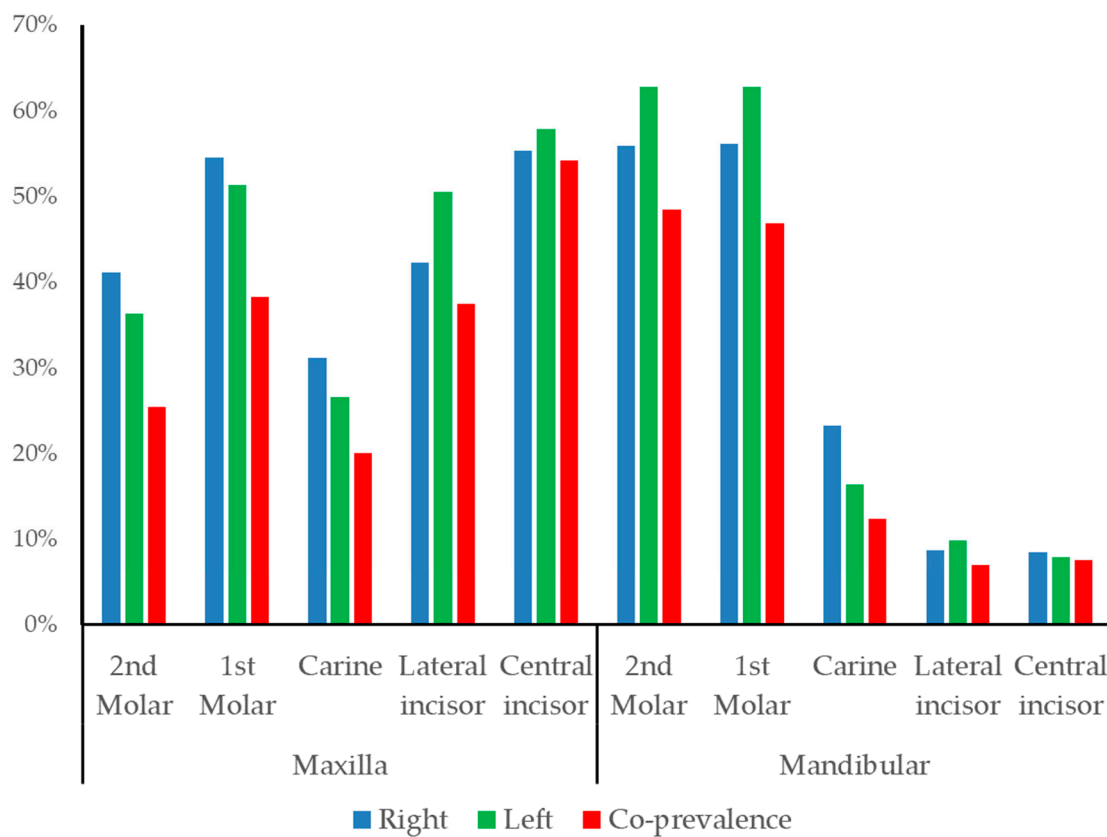

Figure S3. Co-prevalence of dental caries for symmetry teeth.

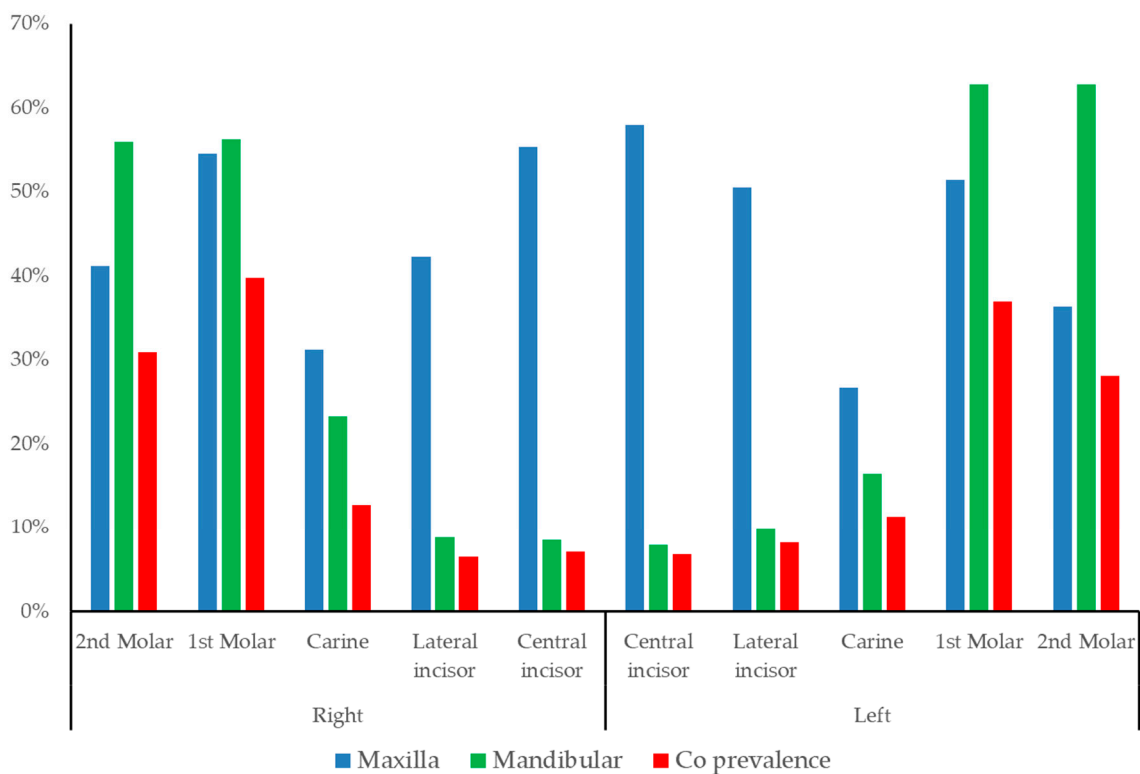

Figure S4. Co-prevalence of dental caries for counter arch teeth.

**Table S1.** Number of dental caries in primary dentition by grade and gender.

| Grade | Gender | Prevalence |      | dmft      |                    |
|-------|--------|------------|------|-----------|--------------------|
|       |        | <i>n</i>   | %    | Mean (SD) | Median (25th–75th) |
| 0     | Male   | 94/95      | 98.9 | 8.1+/-5.0 | 8(4–11)            |
|       | Female | 71/79      | 90.0 | 7.4+/-5.2 | 7(3–11)            |
|       | Total  | 165/178    | 92.7 | 7.7+/-5.1 | 7(4–11)            |
| 1     | Male   | 78/82      | 95.1 | 7.5+/-4.6 | 7(4–11)            |
|       | Female | 60/63      | 95.2 | 7.9+/-4.5 | 8(4–12)            |
|       | Total  | 138/145    | 95.2 | 7.7+/-4.8 | 7(4–11)            |
| 2     | Male   | 17/18      | 94.4 | 5.6+/-3.4 | 6(3–8)             |
|       | Female | 9/11       | 81.8 | 6.1+/-5.4 | 6(1–8)             |
|       | Total  | 26/29      | 89.7 | 5.8+/-4.2 | 6(2–8)             |

By the two way analysis of variance, age and gender were not statistically significant; *P*-values were for age, *P* = 0.895 for gender, *P* = 0.239 for grade, and *P* = 0.551 for interaction of age and gender.

**Table S2.** Tooth conditions in primary dentition analyzed in this study.

| Grade |          | Sound | Decayed | Missing | Deciduous | Total |
|-------|----------|-------|---------|---------|-----------|-------|
| 0     | <i>n</i> | 921   | 831     | 18      | 10        | 1780  |
|       | %        | 51.7% | 46.7%   | 1.0%    | 0.6%      |       |
| 1     | <i>n</i> | 710   | 625     | 14      | 101       | 1450  |
|       | %        | 49.0% | 43.1%   | 1.0%    | 7.0%      |       |
| 2     | <i>n</i> | 133   | 85      | 1       | 71        | 290   |
|       | %        | 45.9% | 29.3%   | 0.3%    | 24.5%     |       |
| Total | <i>n</i> | 1764  | 1541    | 33      | 182       | 3520  |
|       | %        | 50.1% | 43.8%   | 0.9%    | 5.2%      |       |

**Table S3.** Descriptive statistics for permanent teeth.**(A) Mean number of permanent teeth.**

| Grade | Gender | <i>n</i> | Sound Teeth |                   | Decayed Teeth (DMFT) |                   |
|-------|--------|----------|-------------|-------------------|----------------------|-------------------|
|       |        |          | Mean (SD)   | Median(25th–75th) | Mean (SD)            | Median(25th–75th) |
| 0     | Male   | 99       | 0.45+/-1.19 | 0(0–0)            | 0.06+/-0.6           | 0(0–0)            |
|       | Female | 79       | 0.57+/-1.06 | 0(0–1)            | 0.01+/-0.11          | 0(0–0)            |
| 1     | Male   | 82       | 3.79+/-3.29 | 3(1–6)            | 0.02+/-0.22          | 0(0–0)            |
|       | Female | 63       | 3.56+/-2.48 | 4(1–5)            | 0.13+/-0.42          | 0(0–0)            |
| 2     | Male   | 18       | 6.89+/-2.95 | 6.5(4–9)          | 0.06+/-0.24          | 0(0–0)            |
|       | Female | 11       | 9.18+/-3.19 | 10(6–12)          | 0.27+/-0.65          | 0(0–0)            |

**(B) Number of conditions of permanent teeth.**

| Grade | Sound teeth | Decayed teeth | Not Erupted teeth | Total |
|-------|-------------|---------------|-------------------|-------|
| 0     | 90          | 7             | 4709              | 4806  |
|       | 1.9%        | 0.1%          | 98.0%             |       |
| 1     | 536         | 9             | 3370              | 3915  |
|       | 13.7%       | 0.2%          | 86.1%             |       |
| 2     | 225         | 4             | 554               | 783   |
|       | 28.7%       | 0.5%          | 70.8%             |       |
| Total | 851         | 20            | 8633              | 9504  |
|       | 9.0%        | 0.2%          | 90.8%             |       |

**Table S4.** IRT model for the prevalence of teeth in primary dentition.

|            |                 | <b>Discrimination</b> | <b>Difficulty</b> | <b>Guessing</b> |
|------------|-----------------|-----------------------|-------------------|-----------------|
| Maxilla    | 2nd Molar       | 0.97                  | 0.56              | <0.01           |
|            | 1st Molar       | 1.74                  | -0.10             | <0.01           |
|            | Canine          | 2.13                  | 0.72              | <0.01           |
|            | Lateral incisor | 1.77                  | 0.14              | <0.01           |
|            | Central Incisor | 0.85                  | -0.37             | <0.01           |
| Mandibular | 2nd Molar       | 1.77                  | -0.32             | <0.01           |
|            | 1st Molar       | 1.58                  | -0.35             | <0.01           |
|            | Canine          | 2.37                  | 1.25              | 0.02            |
|            | Lateral incisor | 26.22                 | 1.13              | 0.02            |
|            | Central Incisor | 3.68                  | 1.55              | 0.01            |

**Table S5.** IRT model for the prevalence pattern of dental caries in primary dentition.

|          |                                    | <b>Discrimination</b> | <b>Difficulty</b> | <b>Guessing</b> |
|----------|------------------------------------|-----------------------|-------------------|-----------------|
| Anterior | Maxilla unilateral                 | 1.48                  | -0.81             | <0.001          |
|          | Maxilla bilateral                  | 1.24                  | -0.48             | <0.001          |
|          | Mandibular unilateral              | 36.87                 | 0.42              | <0.001          |
|          | Mandibular bilateral               | 7.42                  | 0.99              | <0.001          |
|          | Maxillary arch only                | 1.48                  | -0.81             | <0.001          |
|          | Mandibular arch only               | 36.87                 | 0.42              | <0.001          |
|          | Both maxillary and mandibular arch | 59.29                 | 0.70              | <0.001          |
| Molar    | Maxilla unilateral                 | 2.11                  | -0.71             | <0.001          |
|          | Maxilla bilateral                  | 1.39                  | 0.26              | <0.001          |
|          | Mandibular unilateral              | 2.97                  | -0.95             | <0.001          |
|          | Mandibular bilateral               | 1.70                  | -0.29             | <0.001          |
|          | Maxillary arch only                | 2.11                  | -0.71             | <0.001          |
|          | Mandibular arch only               | 2.97                  | -0.95             | <0.001          |
|          | Both maxillary and mandibular arch | 3.18                  | -0.34             | <0.001          |
